# Supplementary material for: Impact of Vegetation Cover Structure on Birds' Community at Tianfu National Wetland Park in Jiangsu Kunshan, China
Source: Research Square preprint supplement (doi:10.21203/rs.3.rs-893247/v2), 2021-09-27
Supplement: Supplementary file 1 [file 8c93823ae9fc6445c6b460b9.docx]

Supplementary Materials

Appendix. 1. List of Plants recorded in Tianfu National Wetland Park.

| No | Plant Latin Name | Summer | Autumn | Winter | Spring |
| --- | --- | --- | --- | --- | --- |
| 1 | *Setaria viridis (Linn.) Beauv.* | 0 | 195 | 0 | 0 |
| 2 | *Emilia sonchifolia (Linn.) DC.* | 0 | 3 | 0 | 0 |
| 3 | *Erigeron annuus (Linn.) Pers.* | 107 | 16 | 2 | 75 |
| 4 | *Abutilon theophrasti Medicus* | 7 | 0 | 0 | 0 |
| 5 | *Artemisia argyi Lévl. et Van.* | 54 | 15 | 1 | 279 |
| 6 | *Medicago sativa Linn.* | 0 | 0 | 323 | 0 |
| 7 | *Alternanthera philoxeroides (Mart.) Griseb.* | 1203 | 1090 | 0 | 102 |
| 8 | *Amaranthus tricolor L.* | 291 | 127 | 0 | 0 |
| 9 | *Acalypha australis Linn.* | 0 | 4 | 0 | 0 |
| 10 | *Syngonium podophyllum Schott* | 5 | 0 | 0 | 0 |
| 11 | *Aster subulatus Michx.* | 1491 | 1574 | 1039 | 15 |
| 12 | *Cerastium glomeratum Thuill.* | 0 | 0 | 25 | 447 |
| 13 | *Echinochloa crusgali (Linn.) Beauv.* | 518 | 4408 | 5 | 0 |
| 14 | *Pontederia cordata L.* | 8 | 0 | 0 | 0 |
| 15 | *Cynodon dactylon (Linn.) Pers.* | 5704 | 10040 | 9983 | 1480 |
| 16 | *Vigna radiata (Linn.) Wilczek* | 2 | 0 | 0 | 0 |
| 17 | *Solanum dulcamara L.* | 1 | 0 | 0 | 10 |
| 18 | *Syzygium cumini* | 0 | 0 | 0 | 5 |
| 19 | *Cayratia japonica (Thunb.) Gagnep.* | 0 | 34 | 0 | 7 |
| 20 | *Brasenia schreberi J. F. Gmel.* | 0 | 190 | 0 | 0 |
| 21 | *Ranunculus japonicus Thunb.* | 0 | 0 | 0 | 1686 |
| 22 | *Buxus bodinieri Lévl.* | 1200 | 0 | 0 | 0 |
| 23 | *Acorus calamus Linn.* | 83 | 130 | 0 | 0 |
| 24 | *Plantago asiatica Linn.* | 0 | 0 | 29 | 36 |
| 25 | *Cardamine hirsuta Linn.* | 1 | 0 | 0 | 0 |
| 26 | *Typha orientalis Presl* | 0 | 143 | 3 | 78 |
| 27 | *Panicum bisulcatum Thunb.* | 0 | 125 | 0 | 0 |
| 28 | *Eclipta prostrata (Linn.) Linn.* | 12 | 31 | 20 | 0 |
| 29 | *Sapium sebiferum (Linn.) Roxb.* | 4 | 0 | 0 | 0 |
| 30 | *Hypericum japonicum Thunb. ex Murray* | 0 | 0 | 25 | 1553 |
| 311 | *Trifolium repens Linn.* | 0 | 25 | 0 | 0 |
| 32 | *Coreopsis grandiflora Hogg.* | 7 | 0 | 0 | 0 |
| 33 | *Coriandrum sativum Linn.* | 0 | 73 | 574 | 25 |
| 34 | *Kummerowia striata (Thunb.) Schindl.* | 609 | 701 | 0 | 0 |
| 35 | *Nasturtium officinale R. Br.* | 0 | 0 | 0 | 10 |
| 36 | *Cyperus rotundus L.* | 11 | 126 | 0 | 271 |
| 37 | *Taraxacum mongolicum Hand.-Mazz.* | 19 | 37 | 59 | 21 |
| 38 | *Delphinium grandiflorum Linn.* | 0 | 0 | 9 | 0 |
| 39 | *Triarrhena sacchariflora (Maxim.) Nakai* | 0 | 0 | 5 | 0 |
| 40 | *Setaria viridis (Linn.) Beauv.* | 169 | 0 | 0 | 0 |
| 41 | *Lemna minor Linn.* | 1500 | 0 | 0 | 0 |
| 42 | *Hedyotis auriclaria Linn.* | 10 | 0 | 45 | 0 |
| 43 | *Abelia chinensis R. Br.* | 0 | 123 | 2 | 0 |
| 44 | *Sonchus arvensis Linn.* | 47 | 49 | 12 | 0 |
| 45 | *Oenothera biennis Linn.* | 0 | 4 | 0 | 0 |
| 46 | *Erigeron acer Linn.* | 16 | 1 | 35 | 0 |
| 47 | *Beckmannia syzigachne (Steud.) Fern.* | 0 | 5 | 0 | 0 |
| 48 | *Cyperus rotundus Linn.* | 20 | 0 | 0 | 0 |
| 49 | *Kochia scoparia (Linn.) Schrad.* | 0 | 52 | 0 | 0 |
| 50 | *Elephantopus scaber Linn.* | 90 | 0 | 652 | 0 |
| 51 | *Geranium wilfordii Maxim.* | 0 | 52 | 108 | 1125 |
| 52 | *Codonopsis lanceolata (Sieb. et Zucc.) Trautv.* | 0 | 0 | 2 | 0 |
| 53 | *Deschampsia cespitosa (L.) P. Beauv.* | 220 | 0 | 0 | 0 |
| 54 | *Eleusine indica (L.) Gaertn.* | 1839 | 2480 | 2486 | 0 |
| 55 | *Veronica didyma Tenore* | 0 | 0 | 45 | 14 |
| 56 | *Oryza sativa L.* | 0 | 490 | 46 | 220 |
| 57 | *Nepeta glechoma Benth., Nepeta hederacea (L.)* | 0 | 0 | 0 | 40 |
| 58 | *Calystegia soldanella (Linn.) R. Br.* | 2 | 0 | 0 | 0 |
| 59 | *Aeschynomene indica Linn.* | 442 | 28 | 0 | 0 |
| 60 | *Taraxacum mongolicum Hand.-Mazz.* | 0 | 750 | 0 | 0 |
| 61 | *Hosta plantaginea （Lam.） Aschers.* | 0 | 0 | 0 | 2 |
| 62 | *Humulus scandens (Lour.) Merr.* | 164 | 0 | 45 | 129 |
| 63 | *Imperata cylindrica (L.) Beauv.* | 11069 | 3171 | 2111 | 381 |
| 64 | *Iris tectorum Maxim.* | 1 | 0 | 0 | 0 |
| 65 | *Jasminum sambac (L.) Aiton* | 0 | 0 | 0 | 21 |
| 66 | *Kalanchoe pinnata* | 1 | 0 | 0 | 0 |
| 67 | *Bassia scoparia* | 0 | 1 | 0 | 0 |
| 68 | *Trigonotis peduncularis* | 0 | 0 | 0 | 2 |
| 69 | *Lysimachia candida Lindl.* | 0 | 0 | 0 | 80 |
| 70 | *Metaplexis japonica (Thunb.) Makino* | 36 | 82 | 0 | 0 |
| 71 | *Arundo donax .* | 7 | 0 | 0 | 0 |
| 72 | *Salvia plebeia R. Br.* | 1 | 0 | 0 | 9 |
| 73 | *Kalimeris indica (Linn.) Sch.-Bip.* | 40 | 44 | 4 | 0 |
| 74 | *Digitaria sanguinalis (Linn.) Scop.* | 43 | 28 | 0 | 0 |
| 75 | *Astragalus sinicus L.* | 10 | 0 | 0 | 3 |
| 76 | *Panicum miliaceum L.* | 0 | 7 | 0 | 0 |
| 77 | *Duchesnea indica (Andr.) Focke* | 0 | 0 | 0 | 19 |
| 78 | *Zizania latifolia (Griseb.) Stapf* | 0 | 9 | 0 | 91 |
| 79 | *Myriophyllum verticillatum Linn.* | 0 | 245 | 0 | 0 |
| 80 | *Melia azedarach L.* | 5 | 0 | 0 | 0 |
| 81 | *Lavandula Linn.* | 0 | 191 | 0 | 0 |
| 82 | *Hibiscus syriacus Linn.* | 0 | 0 | 3 | 0 |
| 83 | *Ophiopogon japonicus (Linn. f.) Ker-Gawl.* | 10 | 0 | 0 | 0 |
| 84 | *Typha orientalis Presl* | 0 | 7 | 0 | 0 |
| 85 | *Broussonetia papyrifera* | 1 | 0 | 0 | 0 |
| 86 | *Paspalum paspaloides (Michx.) Scribn.* | 1939 | 1635 | 3340 | 31 |
| 87 | *Paspalum thunbergii Kunth ex Steud.* | 0 | 2058 | 1755 | 265 |
| 88 | *Galium spurium L.* | 0 | 400 | 0 | 158 |
| 89 | *Galium aparine Linn. var. tenerum Gren.et Godr.) Rebb.* | 0 | 0 | 0 | 125 |
| 90 | *Marsilea quadrifolia Linnaeus* | 54 | 0 | 0 | 0 |
| 91 | *Plantago asiatica Linn.* | 72 | 29 | 0 | 123 |
| 92 | *Zizania latifolia (Griseb. ) Stapf* | 1 | 0 | 0 | 0 |
| 93 | *Poa annua L.* | 0 | 0 | 0 | 17 |
| 94 | *Ludwigia prostrata Roxb.* | 9 | 17 | 0 | 40 |
| 95 | *Polygonum aviculare L.* | 0 | 3 | 0 | 0 |
| 96 | *Polygonum persicaria Linn.* | 0 | 1 | 0 | 0 |
| 97 | *Populus alba* | 0 | 1 | 0 | 0 |
| 98 | *Veronica didyma Tenore* | 0 | 0 | 0 | 13 |
| 99 | *Echinochloa crusgalli (L.) Beauv.* | 9 | 0 | 0 | 151 |
| 100 | *Ligustrum lucidum Ait.* | 0 | 0 | 4 | 0 |
| 101 | *Prunus salicina var. pubipes (Koehne) Bailey* | 0 | 0 | 0 | 337 |
| 102 | *Pterocarpus indicus* | 517 | 20 | 30 | 0 |
| 103 | *Ipomoea coccinea* | 15 | 0 | 0 | 0 |
| 104 | *Phragmites australis (Cav.) Trin. ex Steud.* | 33 | 84 | 40 | 47 |
| 105 | *Oryza sativa L.* | 2127 | 3406 | 0 | 0 |
| 106 | *Pterocypsela indica (Linn.) Shih* | 1 | 41 | 0 | 1 |
| 107 | *cat cauda* | 123 | 0 | 0 | 0 |
| 108 | *Allium sativum Pisum elatius* | 4 | 224 | 1306 | 0 |
| 109 | *indica Alopecuropsis* | 0 | 0 | 0 | 50 |
| 110 | *Arthraxon hispidus(Thunb.)Makino* | 1681 | 3460 | 4520 | 0 |
| 111 | *Boswellia serrata* | 0 | 0 | 0 | 17 |
| 112 | *Setaria viridis* | 279 | 5567 | 5360 | 0 |
| 113 | *Ranunculus sceleratus L.* | 0 | 0 | 0 | 2 |
| 114 | *Kyllinga brevifolia Rottb. Descr. et Ic.* | 56 | 0 | 0 | 0 |
| 115 | *Echinopsis tubiflora (Pfeiff.) Zucc. ex A.Dietr.* | 0 | 0 | 0 | 3 |
| 116 | *Cnidium monnieri (Linn.) Cuss.* | 134 | 2 | 59 | 436 |
| 117 | *Solanum nigrum L.* | 0 | 0 | 0 | 6 |
| 118 | *Solidago decurrens Lour.* | 56 | 52 | 0 | 869 |
| 119 | *Solidago decurrens Lour.* | 0 | 182 | 254 | 15 |
| 120 | *Robinia pseudoacacia Linn.* | 1 | 3 | 4 | 5 |
| 121 | *Rumex acetosa L.* | 3 | 192 | 1140 | 413 |
| 122 | *Torilis scabra (Thunb.) DC.* | 0 | 2 | 0 | 0 |
| 123 | *Brassica oleracea var.botrytis* | 4 | 0 | 0 | 0 |
| 124 | *Cirsium japonicum Fisch. ex DC.* | 0 | 3 | 0 | 0 |
| 125 | *Semiaquilegia adoxoides (DC.) Makino* | 0 | 0 | 25 | 0 |
| 126 | *Carpesium Abrotanoides* | 2 | 0 | 0 | 1 |
| 127 | *Cynodondactylon(Linn.)Pers.* | 0 | 0 | 0 | 15 |
| 128 | *Fallopia Japonica* | 0 | 15 | 0 | 0 |
| 129 | *Trifolium repens L.* | 87 | 235 | 440 | 0 |
| 130 | *Hydrocharis dubia (Bl.) Backer* | 0 | 65 | 0 | 0 |
| 131 | *Dracaena trifasciata* | 0 | 0 | 0 | 70 |
| 132 | *Vicia sativa* | 139 | 326 | 2248 | 6086 |
| 133 | *Davallia brevisora Chin* | 0 | 0 | 0 | 1 |
| 134 | *Viola verecunda A. Gray* | 0 | 49 | 0 | 0 |
| 135 | *Trapa bispinosa Roxb.* | 0 | 85 | 0 | 0 |
| 136 | *Sacciolepis interrupta (Willd. ) Stapf* | 18 | 0 | 0 | 1 |
| 137 | *Sagittaria natans* | 0 | 0 | 15 | 0 |
| 138 | *Quamoclit coccinea (L.) Moench* | 0 | 0 | 0 | 510 |
| 139 | *Prunella vulgaris L* | 0 | 0 | 1 | 0 |
| 140 | *Artemisia absinthium* | 18 | 0 | 0 | 78 |
| 141 | *Cayratia Japonica* | 6 | 0 | 0 | 0 |
| 142 | *Cyperus rotundus Linn.* | 1 | 3 | 0 | 0 |
| 143 | *Viciahirsuta(L.) S. F. Gray* | 0 | 0 | 0 | 40 |
| 144 | *Youngia japonica (Linn.) DC.* | 0 | 0 | 1 | 7 |
| 145 | *Monochoria korsakowii Regel & Maack* | 18 | 0 | 0 | 0 |
| 146 | *Euphorbia helioscopia L.* | 3 | 0 | 41 | 62 |
| 147 | *Orychophragmus violaceus (L.) O. E. Schulz* | 0 | 0 | 0 | 1 |
| 148 | *Rorippa cantoniensis (Lour.)* | 0 | 0 | 0 | 3 |
|  | **Total** | **34490** | **45066** | **38281** | **18235** |

Appendix. 2. List of the avian observed in summer and autumn

| No | *Latin Name* | Summer | Autumn | Winter | Spring |
| --- | --- | --- | --- | --- | --- |
| 1 | *Accipiter gentilis* | 0 | 0 | 1 | 0 |
| 2 | *Accipiter gularis* | 0 | 1 | 0 | 0 |
| 3 | *Accipiter soloensis* | 0 | 0 | 0 | 4 |
| 4 | *Acridotheres cristatellus* | 9 | 18 | 16 | 25 |
| 5 | *Acrocephalus orientalis* | 0 | 0 | 0 | 0 |
| 6 | *Actitis hypoleucos* | 0 | 0 | 0 | 3 |
| 7 | *Aix galericulata* | 0 | 5 | 27 | 0 |
| 8 | *Alauda gulgula* | 2 | 12 | 0 | 2 |
| 9 | *Alcedo atthis* | 5 | 9 | 2 | 6 |
| 10 | *Amaurornis phoenicurus* | 11 | 14 | 0 | 12 |
| 11 | *Anas acuta* | 0 | 4 | 0 | 0 |
| 12 | *Anas clypeata* | 0 | 0 | 1 | 0 |
| 13 | *Anas crecca* | 0 | 95 | 15 | 51 |
| 14 | *Anas falcata* | 0 | 8 | 0 | 0 |
| 15 | *Anas formosa* | 0 | 6 | 1 | 0 |
| 16 | *Anas penelope* | 0 | 2 | 0 | 1 |
| 17 | *Anas platyrhynchos* | 1 | 14 | 15 | 0 |
| 18 | *Anas poecilorhyncha* | 0 | 77 | 38 | 97 |
| 19 | *Anas querquedula* | 0 | 1 | 0 | 0 |
| 20 | *Anser albifrons* | 0 | 42 | 0 | 0 |
| 21 | *Anthus cervinus* | 0 | 0 | 10 | 2 |
| 22 | *Anthus gustavi* | 0 | 0 | 0 | 2 |
| 23 | *Anthus hodgsoni* | 0 | 10 | 17 | 2 |
| 24 | *Anthus richardi* | 0 | 1 | 34 | 0 |
| 25 | *Anthus rubescens* | 0 | 2 | 0 | 0 |
| 26 | *Anthus spinoletta* | 0 | 0 | 0 | 0 |
| 27 | *Apus pacificus* | 0 | 0 | 0 | 2 |
| 28 | *Ardea cinerea* | 3 | 9 | 10 | 13 |
| 29 | *Ardea purpurea* | 0 | 0 | 0 | 0 |
| 30 | *Ardeola bacchus* | 8 | 9 | 0 | 4 |
| 311 | *Asio flammeus* | 0 | 0 | 0 | 0 |
| 32 | *Botaurus stellaris* | 0 | 0 | 0 | 0 |
| 33 | *Bubulcus ibis* | 7 | 8 | 0 | 11 |
| 34 | *Butastur indicus* | 0 | 0 | 0 | 0 |
| 35 | *Buteo buteo* | 0 | 1 | 1 | 2 |
| 36 | *Butorides striatus* | 0 | 0 | 0 | 0 |
| 37 | *Calidris acuminata* | 0 | 0 | 0 | 0 |
| 38 | *Calidris alpina* | 0 | 0 | 0 | 0 |
| 39 | *Calidris subminuta* | 0 | 0 | 0 | 0 |
| 40 | *Calidris temminckii* | 0 | 0 | 0 | 0 |
| 41 | *Caprimulgus indicus* | 0 | 0 | 0 | 0 |
| 42 | *Carduelis sinica* | 1 | 4 | 0 | 5 |
| 43 | *Carduelis spinus* | 0 | 150 | 0 | 0 |
| 44 | *Casmerodius albus* | 5 | 6 | 1 | 1 |
| 45 | *Centropus bengalensis* | 2 | 2 | 0 | 0 |
| 46 | *Chlidonias hybrida* | 2 | 2 | 0 | 0 |
| 47 | *Chlidonias leucoptera* | 2 | 2 | 0 | 0 |
| 48 | *Circus spilonotus* | 0 | 0 | 0 | 0 |
| 49 | *Cisticola juncidis* | 7 | 13 | 1 | 8 |
| 50 | *Copsychus saularis* | 2 | 3 | 0 | 2 |
| 51 | *Corvus corone* | 0 | 0 | 0 | 0 |
| 52 | *Coturnix japonica* | 0 | 2 | 0 | 4 |
| 53 | *Cuculus micropterus* | 0 | 0 | 0 | 0 |
| 54 | *Cyanopica cyana* | 5 | 36 | 31 | 27 |
| 55 | *Dendrocopos major* | 0 | 0 | 0 | 1 |
| 56 | *Dicrurus macrocercus* | 0 | 0 | 0 | 0 |
| 57 | *Dupetor flavicollis* | 0 | 0 | 0 | 0 |
| 58 | *Egretta garzetta* | 40 | 47 | 5 | 22 |
| 59 | *Emberiza aureola* | 0 | 3 | 0 | 0 |
| 60 | *Emberiza chrysophrys* | 0 | 0 | 0 | 4 |
| 61 | *Emberiza elegans* | 0 | 7 | 10 | 5 |
| 62 | *Emberiza fucata* | 0 | 5 | 2 | 3 |
| 63 | *Emberiza pallasi* | 0 | 4 | 2 | 0 |
| 64 | *Emberiza pusilla* | 0 | 5 | 2 | 6 |
| 65 | *Emberiza rustica* | 0 | 24 | 65 | 0 |
| 66 | *Emberiza spodocephala* | 0 | 17 | 33 | 51 |
| 67 | *Emberiza tristrami* | 0 | 1 | 0 | 1 |
| 68 | *Emberiza yessoensis* | 0 | 0 | 2 | 0 |
| 69 | *Eophona migratoria* | 3 | 11 | 32 | 16 |
| 70 | *Eudynamys scolopacea* | 0 | 0 | 0 | 0 |
| 71 | *Eurystomus orientalis* | 1 | 1 | 0 | 1 |
| 72 | *Falco peregrinus* | 0 | 0 | 1 | 0 |
| 73 | *Falco tinnunculus* | 0 | 2 | 0 | 2 |
| 74 | *Ficedula mugimaki* | 0 | 0 | 0 | 0 |
| 75 | *Ficedula parva* | 0 | 0 | 1 | 0 |
| 76 | *Fringilla montifringilla* | 0 | 36 | 3 | 4 |
| 77 | *Fulica atra* | 0 | 0 | 1 | 0 |
| 78 | *Gallinago gallinago* | 0 | 8 | 0 | 53 |
| 79 | *Gallinago megala* | 0 | 0 | 0 | 2 |
| 80 | *Gallinago stenura* | 0 | 0 | 0 | 1 |
| 81 | *Gallinula chloropus* | 16 | 68 | 18 | 62 |
| 82 | *Garrulax perspicillatus* | 0 | 2 | 0 | 0 |
| 83 | *Himantopus himantopus* | 0 | 0 | 0 | 3 |
| 84 | *Hirundo daurica* | 5 | 5 | 0 | 11 |
| 85 | *Hirundo rustica* | 51 | 51 | 0 | 22 |
| 86 | *Hydrophasianus chirurgus* | 9 | 11 | 0 | 1 |
| 87 | *Ixobrychus cinnamomeus* | 0 | 0 | 0 | 0 |
| 88 | *Ixobrychus sinensis* | 2 | 2 | 0 | 0 |
| 89 | *Lanius cristatus* | 0 | 0 | 0 | 0 |
| 90 | *Lanius schach* | 12 | 23 | 7 | 20 |
| 91 | *Lanius sphenocercus* | 0 | 0 | 1 | 0 |
| 92 | *Lonchura punctulata* | 0 | 0 | 30 | 0 |
| 93 | *Lonchura striata* | 4 | 4 | 0 | 2 |
| 94 | *Luscinia calliope* | 0 | 1 | 0 | 0 |
| 95 | *Mesophoyx intermedia* | 15 | 15 | 0 | 3 |
| 96 | *Motacilla alba* | 2 | 7 | 30 | 17 |
| 97 | *Motacilla cinerea* | 0 | 0 | 0 | 0 |
| 98 | *Motacilla flava* | 0 | 0 | 0 | 0 |
| 99 | *Muscicapa griseisticta* | 0 | 0 | 0 | 1 |
| 100 | *Muscicapa sibirica* | 0 | 0 | 0 | 0 |
| 101 | *Nycticorax nycticorax* | 15 | 18 | 33 | 13 |
| 102 | *Oriolus chinensis* | 0 | 0 | 0 | 1 |
| 103 | *Paradoxornis webbianus* | 18 | 57 | 20 | 72 |
| 104 | *Parus major* | 4 | 10 | 2 | 17 |
| 105 | *Parus venustulus* | 0 | 13 | 0 | 0 |
| 106 | *Passer montanus* | 7 | 61 | 260 | 90 |
| 107 | *Phasianus colchicus* | 2 | 9 | 8 | 12 |
| 108 | *Phoenicurus auroreus* | 0 | 21 | 7 | 3 |
| 109 | *Phylloscopus borealis* | 0 | 0 | 0 | 0 |
| 110 | *Phylloscopus coronatus* | 0 | 0 | 0 | 1 |
| 111 | *Phylloscopus fuscatus* | 0 | 2 | 0 | 0 |
| 112 | *Phylloscopus inornatus* | 0 | 6 | 0 | 2 |
| 113 | *Phylloscopus proregulus* | 0 | 2 | 7 | 12 |
| 114 | *Phylloscopus tenellipes* | 0 | 0 | 0 | 0 |
| 115 | *Pica pica* | 9 | 107 | 51 | 67 |
| 116 | *Prinia inornata* | 4 | 10 | 5 | 10 |
| 117 | *Pycnonotus sinensis* | 23 | 64 | 27 | 109 |
| 118 | *Recurvirostra avosetta* | 0 | 0 | 0 | 0 |
| 119 | *Regulus regulus* | 0 | 2 | 0 | 0 |
| 120 | *Remiz consobrinus* | 0 | 12 | 0 | 4 |
| 121 | *Riparia riparia* | 0 | 2 | 0 | 0 |
| 122 | *Rostratula benghalensis* | 0 | 0 | 0 | 0 |
| 123 | *Saxicola torquata* | 0 | 6 | 1 | 3 |
| 124 | *Scolopax rusticola* | 0 | 0 | 0 | 0 |
| 125 | *Streptopelia chinensis* | 16 | 68 | 15 | 41 |
| 126 | *Streptopelia orientalis* | 10 | 120 | 174 | 60 |
| 127 | *Streptopelia tranquebarica* | 0 | 1 | 0 | 0 |
| 128 | *Sturnus cineraceus* | 12 | 36 | 82 | 15 |
| 129 | *Sturnus nigricollis* | 6 | 13 | 3 | 5 |
| 130 | *Sturnus sericeus* | 16 | 16 | 0 | 0 |
| 131 | *Tachybapus ruficollis* | 19 | 39 | 20 | 2 |
| 132 | *Tadorna tadorna* | 0 | 0 | 0 | 0 |
| 133 | *Tarsiger cyanurus* | 0 | 3 | 3 | 1 |
| 134 | *Terpsiphone paradisi* | 0 | 0 | 0 | 0 |
| 135 | *Tringa erythropus* | 0 | 0 | 0 | 0 |
| 136 | *Tringa glareola* | 17 | 17 | 0 | 4 |
| 137 | *Tringa nebularia* | 0 | 1 | 2 | 2 |
| 138 | *Tringa ochropus* | 1 | 4 | 1 | 0 |
| 139 | *Tringa stagnatilis* | 0 | 0 | 0 | 0 |
| 140 | *Turdus cardis* | 0 | 0 | 0 | 0 |
| 141 | *Turdus eunomus* | 0 | 185 | 19 | 3 |
| 142 | *Turdus hortulorum* | 0 | 4 | 5 | 5 |
| 143 | *Turdus merula* | 11 | 177 | 40 | 135 |
| 144 | *Turdus naumanni* | 0 | 2 | 0 | 0 |
| 145 | *Turdus obscurus* | 0 | 0 | 1 | 0 |
| 146 | *Turdus pallidus* | 0 | 1 | 2 | 1 |
| 147 | *Upupa epops* | 0 | 0 | 0 | 0 |
| 148 | *Urocissa erythrorhyncha* | 0 | 1 | 0 | 0 |
| 149 | *Vanellus vanellus* | 0 | 0 | 0 | 0 |
| 150 | *Zoothera dauma* | 0 | 0 | 1 | 0 |
| 151 | *Zosterops japonicus* | 0 | 1 | 0 | 2 |
|  | **Total** | **45** | **92** | **60** | **74** |
